# Supplementary material for: Self-Stigma but not Mental Health Literacy Predicts Attitudes toward Professional Help- Seeking in an Indonesian Community Sample
Source: Research Square preprint supplement (doi:10.21203/rs.3.rs-7621449/v1), 2025-11-26
Supplement: Supplementary file 1 [file 018cec7349252951a8f786c8.docx]

Additional Material to

*Self-Stigma but not Mental Health Literacy Predicts Attitudes toward Professional Help-Seeking in an Indonesian Community Sample*

by Nurul Hartini et al.

**Additional file 5**: STROBE Statement for cohort studies

|  | Item No | Recommendation | Page No |
| --- | --- | --- | --- |
| **Title and abstract** | 1 | (*a*) Indicate the study’s design with a commonly used term in the title or the abstract | (*1a*) Page 1, Title. The design is clearly stated as “A Cross-Sectional Study in the title.  (*1b*) Page 2, Abstract. The abstract includes background, methods, sample size, results, and conclusion in a balanced and informative manner. |
| (*b*) Provide in the abstract an informative and balanced summary of what was done and what was found |
| Introduction | | | |
| Background/rationale | 2 | Explain the scientific background and rationale for the investigation being reported | Page 3. The introduction provides a clear overview of the prevalence of mental disorders globally and in Indonesia, identifies barriers to help-seeking including stigma and poor mental health literacy (MHL), and emphasizes the need for understanding cultural and structural influences in the Indonesia context. This establishes the rationale for the study. |
| Objectives | 3 | State specific objectives, including any prespecified hypotheses | Page 4, last paragraph. The objective is explicitly stated to examine whether MHL and anticipated self-stigma predict attitudes toward professional help-seeking in an Indonesian community sample, controlling for demographic factors and type of mental disorders presented in vignettes. |
| Methods | | | |
| Study design | 4 | Present key elements of study design early in the paper | Page 4, Section 2.1. The study used a convenience sampling strategy and was conducted as a cross-sectional survey between June and August 2022. |
| Setting | 5 | Describe the setting, locations, and relevant dates, including periods of recruitment, exposure, follow-up, and data collection | Page 4-5, Section 2.1. Participants were recruited online from Surabaya, Indonesia, between June and August 2022 through social media and university mailing lists. |
| Participants | 6 | (*a*) Give the eligibility criteria, and the sources and methods of selection of participants. Describe methods of follow-up | (*6a*) Page 5, Section 2.1. Inclusion criteria were: age > 18 years, Indonesian nationality, and residency in Surabaya. Participants were recruited using convenience sampling through online platforms. |
| (*b*)For matched studies, give matching criteria and number of exposed and unexposed | (*6b*) N/A |
| Variables | 7 | Clearly define all outcomes, exposures, predictors, potential confounders, and effect modifiers. Give diagnostic criteria, if applicable | Page 5-6, Sections 2.2.1-2.2.3. The primary predictors were mental health literacy (MHL) and self-stigma; the outcome was attitude toward help-seeking. Confounders controlled for included age, sex, education, and vignette type. |
| Data sources/ measurement | 8* | For each variable of interest, give sources of data and details of methods of assessment (measurement). Describe comparability of assessment methods if there is more than one group | Page 5-6, Sections 2.2.1-2.2.3. MHL was assessed through vignette identification adapted from Jorm et al. (1997); self-stigma was measured using the SSOSH; help-seeking attitudes were measured using the ATSPPH-SF. All instruments were adapted to Indonesian language and their reliability was reported. |
| Bias | 9 | Describe any efforts to address potential sources of bias | Page 5-6, Section 2.2 and 2.3. Random assignment to vignettes helped reduce selection bias regarding mental disorder type. Standardized instruments were used to improve measurement validity. Exclusion of outliers (n = 25) was applied before analysis. |
| Study size | 10 | Explain how the study size was arrived at | Page 6, Section 2.3. A priori power analysis was conducted using G*Power. |
| Quantitative variables | 11 | Explain how quantitative variables were handled in the analyses. If applicable, describe which groupings were chosen and why | Page 6, Section 2.3. Quantitative variables such as self-stigma and attitudes were treated as continuous measures. The MHL variable was dichotomized based on correct identification of vignette diagnosis. |
| Statistical methods | 12 | (*a*) Describe all statistical methods, including those used to control for confounding | (*12a*) Page 6, Section 2.3. Hierarchical multiple regression analysis were used, with age, sex, education, and vignette controlled in the first step. Statistical assumptions were verified before analysis.  (*12b*) N/A  (*12c*) N/A  (*12d*) N/A  (*12e*) N/A |
| (*b*) Describe any methods used to examine subgroups and interactions |
| (*c*) Explain how missing data were addressed |
| (*d*) If applicable, explain how loss to follow-up was addressed |
| (*e*) Describe any sensitivity analyses |
| Results | | |  |
| Participants | 13* | (a) Report numbers of individuals at each stage of study—eg numbers potentially eligible, examined for eligibility, confirmed eligible, included in the study, completing follow-up, and analysed | (*13a*) Page 6-7, Section 3.1. A total 912 participants completed the questionnaire and met inclusion criteria. After removing 25 outliers based on Mahalanobis distance, leverage, and Cook’s distance, 887 participants were retained for the final analysis.  (*13b*) Page 6-7, Section 3.1. The only exclusion was due to statistical outliers and reasons were based on extreme values in multiple detection indices.  (*13c*) N/A |
| (b) Give reasons for non-participation at each stage |
| (c) Consider use of a flow diagram |
| Descriptive data | 14* | (a) Give characteristics of study participants (eg demographic, clinical, social) and information on exposures and potential confounders | (*14a*) Page 6-7, Section 3.1. Demographic characteristics such as age, sex, and education level are described, with a reference to Table 1. Distribution of vignettes and correct recognition (MHL) are also reported.  (*14b*) N/A  (*14c*) N/A |
| (b) Indicate number of participants with missing data for each variable of interest |
| (c) Summarise follow-up time (eg, average and total amount) |
| Outcome data | 15* | Report numbers of outcome events or summary measures over time | Page 7-8, Section 3.3. Summary measures of help-seeking attitudes and their predictors are presented, including regression coefficients, statistical significance, and effect size. |
| Main results | 16 | (*a*) Give unadjusted estimates and, if applicable, confounder-adjusted estimates and their precision (eg, 95% confidence interval). Make clear which confounders were adjusted for and why they were included | (*16a*) Page 7-8, Section 3.3. Both unadjusted and adjusted models are reported. The hierarchical regression controlled for age, sex, education, and vignette type. Results include beta coefficients, significance levels, and explained variance.  (*16b)* N/A  (*16c*) N/A |
| (*b*) Report category boundaries when continuous variables were categorized |
| (*c*) If relevant, consider translating estimates of relative risk into absolute risk for a meaningful time period |
| Other analyses | 17 | Report other analyses done—eg analyses of subgroups and interactions, and sensitivity analyses | Page 9, Section 3.4. A post-hoc power analysis was conducted. No subgroup or interaction analysis were reported. |
| Discussion | | | |
| Key results | 18 | Summarise key results with reference to study objectives | Page 9, Section 4, first paragraph. The discussion opens by restating the study’s main objective and highlighting the primary finding that self-stigma was the strongest predictor of help-seeking attitudes, regardless of vignette type or demographic characteristics. |
| Limitations | 19 | Discuss limitations of the study, taking into account sources of potential bias or imprecision. Discuss both direction and magnitude of any potential bias | Page 12, Section 4.3. The limitations discussed include the minimal internal consistency of the adapted scales (SSOSH and ATSPPH-SF), limitations in the operationalization of MHL and stigma, use of convenience sampling, lack of representation of individuals with lower education or rural backgrounds, and absence of males. Suggesting for future improvements are provided. |
| Interpretation | 20 | Give a cautious overall interpretation of results considering objectives, limitations, multiplicity of analyses, results from similar studies, and other relevant evidence | Page 9-12, Sections 4.1-4.4. The findings in relation to existing Western and Indonesian studies, emphasizing the cultural relevance of self-stigma in collectivistic contexts. The discussion avoids overgeneralization and integrates current results with past research while acknowledging the study’s methodological constraints. |
| Generalisability | 21 | Discuss the generalisability (external validity) of the study results | Page 12, Section 4.4. Generalizability is discussed with regard to sampling limitations. The results may not extend to males, individuals with lower education, or rural populations, and suggest the need for more representative samples in future studies to improve external validity. |
| Other information | | | |
| Funding | 22 | Give the source of funding and the role of the funders for the present study and, if applicable, for the original study on which the present article is based | Page 14, Funding. This study was funded by Universitas Airlangga through the International Research Collaboration 2023 grant. |
