# Supplementary material for: Self-Stigma but not Mental Health Literacy Predicts Attitudes toward Professional Help- Seeking in an Indonesian Community Sample
Source: Research Square preprint supplement (doi:10.21203/rs.3.rs-7621449/v1), 2025-11-26
Supplement: Supplementary file 2 [file 3e8175c0659acbd689fdb71f.docx]

Additional Material to

*Self-Stigma but not Mental Health Literacy Predicts Attitudes toward Professional Help-Seeking in an Indonesian Community Sample*

by Nurul Hartini et al.

**Additional file 4**: Sociodemographic characteristics and responses of the total
sample (N = 912)

| **Variables (value)** | **Descriptive statistics** |
| --- | --- |
|
| Age, range, mean±SD | 18-55, 22.07±4.65 |
| Sex, n (%) |  |
| Male (0) | 353 (38.7%) |
| Female (1) | 559 (61.3%) |
| Education level, n (%) |  |
| 9 years (0) | 4 (0.4%) |
| 12 years (1) | 663 (72.7%) |
| Higher education (2) | 245 (26.9%) |
| Vignette, n (%) |  |
| Depression (0) | 458 (50.2%) |
| Schizophrenia (1) | 454 (49.8%) |
| MHL, correct identification of the vignette, n (%) |  |
| Incorrect (0) | 623 (68.3%) |
| Correct (1) | 289 (31.7%) |
| Self-stigma, range, mean±SD a | 10-43, 24.53±5.67 |
| Attitude towards help-seeking, range, mean±SD b | 13-40, 28.40±4.53 |

MHL: mental health literacy

a Higher total scores indicate more anticipated self-stigma

b Higher total scores indicate more positive attitudes toward seeking professional help
