# Supplementary material for: Self-Stigma but not Mental Health Literacy Predicts Attitudes toward Professional Help- Seeking in an Indonesian Community Sample
Source: Research Square preprint supplement (doi:10.21203/rs.3.rs-7621449/v1), 2025-11-26

Additional Material to

*Self-Stigma but not Mental Health Literacy Predicts Attitudes toward Professional Help-Seeking in an Indonesian Community Sample*

by Nurul Hartini et al.

**Additional file 3**: Tests of the model assumptions of hierarchical regression analysis

M**ulticollinearity** (Spearman’s rho correlations among independent variables**)**

|  | **1** | **2** | **3** | **4** | **5** | **6** |
| --- | --- | --- | --- | --- | --- | --- |
| 1. Sex | 1.0 | .05 | -.06 | .11 | -.02 | .03 |
| 2. Education level |  | 1.0 | -.01 | -.40 | -.01 | -.01 |
| 3. Vignette |  |  | 1.0 | .01 | .08 | .03 |
| 4. Age |  |  |  | 1.0 | -.04 | .07 |
| 5. Mental health literacy |  |  |  |  | 1.0 | -.04 |
| 6. Self-stigma |  |  |  |  |  | 1.0 |

N**ormality of residuals** **Linearity of residuals**


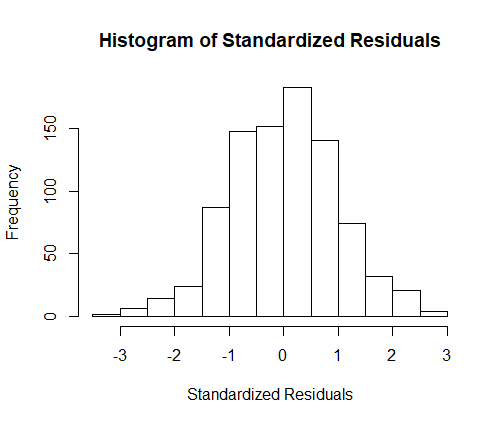

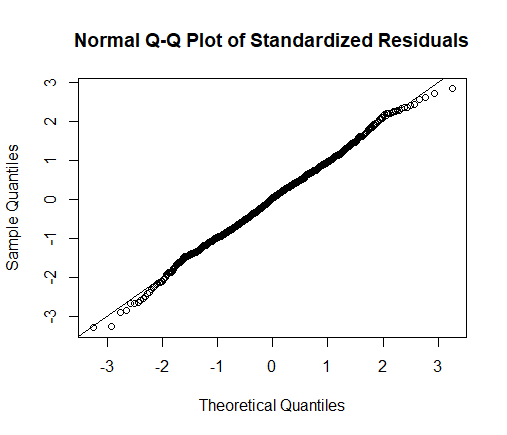


**Homoscedasticity. Equality of variances**


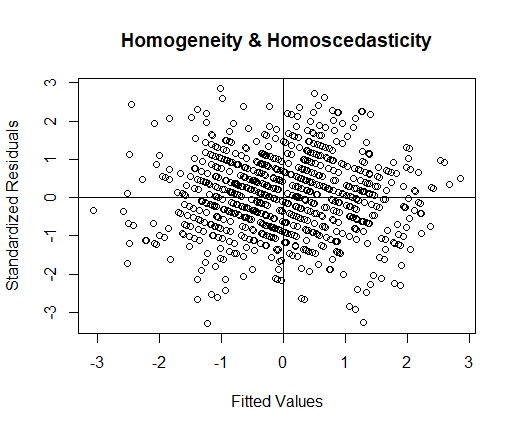

Supplement: Supplementary file 3 [file 53ddd2d2ec94c21bc2d69215.docx]
