# Supplementary material for: Self-Stigma but not Mental Health Literacy Predicts Attitudes toward Professional Help- Seeking in an Indonesian Community Sample
Source: Research Square preprint supplement (doi:10.21203/rs.3.rs-7621449/v1), 2025-11-26
Supplement: Supplementary file 5 [file c63ce76e3f3aa017f9df6b89.docx]

Additional Material to

*Self-Stigma but not Mental Health Literacy Predicts Attitudes toward Professional Help-Seeking in an Indonesian Community Sample*

by Nurul Hartini et al.

**Additional file 2**: Indonesian translation of questionnaires

**Indonesian version of the Self-Stigma Of Seeking Help Scale** (SSOSH; Vogel et al., 2006)

- Saya merasa menjadi orang yang lemah jika pergi ke ahli terapi untuk mendapatkan bantuan psikologis.

*(I would feel inadequate if I went to a therapist for psychological help.)*

- Kepercayaan diri saya TIDAK akan menurun jika saya mencari bantuan profesional. *

*(My self-confidence would NOT go down if I sought professional help.)*

- Mencari bantuan psikologis akan membuat saya merasa kurang pintar.

*(Seeking psychological help would make me feel less intelligent.)*

- Harga diri saya akan meningkat jika saya berkonsultasi dengan seorang ahli terapi. *

*(My self-esteem would increase if I talked to a therapist.)*

- Pandangan saya terhadap diri sendiri tidak akan berubah hanya karena saya memutuskan untuk menemui seorang ahli terapi. *

*(My view of myself would not change just because I made the choice to see a therapist.)*

- Meminta bantuan dari seorang ahli terapi akan membuat saya merasa rendah diri.

*(It would make me feel inferior to ask a therapist for help.)*

- Saya akan merasa baik-baik saja tentang diri saya jika saya memutuskan untuk mencari bantuan profesional. *

*(If I went to a therapist, I would feel okay about myself.)*

- Jika saya pergi ke ahli terapi, saya akan merasa kurang puas dengan diri saya sendiri.

*(If I went to a therapist, I would feel less satisfied with myself.)*

- Kepercayaan diri saya akan tetap sama jika saya mencari bantuan untuk masalah yang tidak bisa saya selesaikan. *

*(My self-confidence would remain the same if I sought help for a problem I could not solve.)*

- Saya akan merasa lebih buruk tentang diri saya jika saya tidak bisa menyelesaikan masalah saya sendiri.

*(I would feel worse about myself if I could not solve my own problems.)*

Note: * Scores are reversed.

**Indonesian version of the Attitudes Toward Seeking Professional Psychological Help Scale-Short Form** (ATSPPH-SF; Fischer and Farina, 1995)

- Jika saya pikir saya punya permasalahan mental, pikiran pertama saya adalah mendapatkan perhatian profesional.

*(If I believed I was having a mental breakdown, my first inclination would be to get professional attention.)*

- Bagi saya, berkonsultasi dengan seorang psikolog tentang permasalahan saya sepertinya adalah cara yang buruk untuk menyelesaikan masalah emosional. *

*(The idea of talking about problems with a psychologist strikes me as a poor way to get rid of emotional conflicts.)*

- Jika saya mengalami permasalahan emosional yang serius, saya yakin terapi psikologis akan membantu.

*(If I were experiencing a serious emotional crisis at this point in my life, I would be confident that I could find relief in psychotherapy.)*

- Saya kagum dengan orang-orang yang mau menyelesaikan masalah dan ketakutan mereka tanpa mencari bantuan profesional. *

*(There is something admirable in the attitude of a person who is willing to cope with his or her conflicts and fears without resorting to professional help.)*

- Jika saya merasa cemas atau sedih dalam waktu yang lama, saya ingin mendapatkan bantuan psikologis.

*(If I were troubled by severe emotional difficulties, I would be inclined to seek professional help.)*

- Saya mungkin ingin menjalani konseling psikologis suatu hari nanti.

*(I might want to have psychological counseling in the future.)*

- Seseorang dengan masalah emosional tidak mungkin menyelesaikannya sendiri, dia lebih mungkin menyelesaikannya dengan bantuan profesional.

*(A person with an emotional problem is not likely to solve it alone; he or she is more likely to solve it with professional help.)*

- Mempertimbangkan waktu dan uang yang dibutuhkan, saya tidak yakin terapi psikologis akan bermanfaat bagi orang seperti saya. *

*(Considering the time and expense involved in psychotherapy, it would have doubtful value for a person like me.)*

- Orang-orang seharusnya menyelesaikan masalah mereka sendiri; sehingga menjalani konseling psikologis menjadi pilihan terakhir mereka. *

*(A person should work out his or her own problems; getting psychological counseling would be a last resort.)*

- Masalah pribadi dan emosional, seperti banyak hal dalam hidup, cenderung akan selesai dengan sendirinya. *

*(Personal and emotional troubles, like many things, tend to work out by themselves.)*

Note: * Scores are reversed.
